# Supplementary material
Source: publisher figshare collection journal article supplement (https://gsajournals.figshare.com/ndownloader/files/23392568)
Supplement: Supplementary file 1 [file 23392568]

**Table S2. Primers used in this study.**

| Primers | Sequence |
| --- | --- |
| HapX_F | GGATCTAGATCTAGCAACCTTGCGGACTCTGATGG |
| HapX_R | TACCGCGGATCCCGGGATTCGTTCGATTCTTCGCCTCT |
| ConfirmF_HapX | CCTCCGAGTGCCTTGTCTTTGTGGC |
| Cir1_full_F | GGATCTGCTAGCCCCGAAACGAATACCTCCGCG |
| Cir1_full_R | GGATCTGGATCCTCAACTCCTAACGTCAAAACTCCACAAC |
| HapX_F_BamHI | GGATCTGGATCCATGTCCGTTGCTGTCTCCGCAC |
| HapX_R_HindIII | GAGTCTAAGCTTTCACGGGATTCGTTCGATTCTTCGCCTCT |
| Cir1_F | GGACCCTTTTATTTATGACCTTGCGGCG |
| Cir1_R_KpnI | AGATCCGGTACCACTCCTAACGTCAAAACTCCACAAC |
| NATterm2F | CTTCATGGCTCCTTGTCTCTGAAACC |
| CFO1_IN F | AGTATCCCGTTCTCGAACAACGTGAC |
| CFO1_IN R | ATCTAGGATGTAAGGGGTAGCAGGTG |
| EMSA_CFO1_F | AGATTGGTGGGACCATAGATCGGTAAGG |
| EMSA_CFO1_R | GCACCGAAGCATGAGTTTCGATCAAAGC |
| EMSA_CCP1_F | CGAGTAGTGTCAAAAGTGGGCG |
| EMSA_CCP1_R | ATATGAACAATGAGGGGGGGGCCAAGTAT |
| M13-F | CACGACGTTGTAAAACGACGGCCAG |
| M13-R | CAGGAAACAGCTATGACCATGATTACG |
| NATstart2 | GCCACTCGAATCCTGCATGCTTAT |
| NATterm2F | CTTCATGGCTCCTTGTCTCTGAAACC |
| NAT-up | CGACTCACTATAGGGCGAATTGGGC |
| Muta_CCP1_R | TCGGCGACATATCAACTTAGCCT |
| Fusion_F | CGCGTGAATCACAAGGCTAAGTTG |
| Final_R | TTGGTAGAATCGTGCTCGGTCC |
| CCP1_F_re | GCCGTTACTAGTGGATCCCGTTAAGCGACATCCCATGTTGTG |
| CCP1_R_re | CATGATTACGCCAAGCTTAGCTTCACGCACTACCGTATCAGC |
| qRT_TEF2_F | TCGCCCGATGGTACATCTAGTAT |
| qRT_TEF2_R | TGCCCGGGTGTATCAATGA |
| qRT_CCP1_F | TCAGGCGGCCCTACCA |
| qRT_CCP1_R | GAGCGGCGTATCCGTCAA |
| Hap2_Nde1_F | GGATCT CATATG GCAGCCTCCCTCCCCATCTTCCA |
| Hap2_HindIII_R | AGATCCAAGCTTTTACGCAGAGGCTTGGGCCGCAT |
| Hap3_ Nde1_F | GGATCTCATATGTCAGAACATACAAATCTCAAGAACCTTGC |
| Hap3_ HindIII_R | AGATCCAAGCTTCTATCGCACACCTTGTGCGTCA |
| Hap5_ Nde1_F | GGATCTCATATGAACCCCTCCTACTTCCTCCCGT |
| Hap5_ HindIII_R | AGATCCAAGCTTCTAATCCCCCTGTACATACTCGC |
